# Supplementary material for: Comprehensive characterization of tissue-specific chromatin accessibility in L2 Caenorhabditis elegans nematodes
Source: Genome Res. 2021 Oct;31(10):1952–69. doi: 10.1101/gr.271791.120 (PMC8494234; doi:10.1101/gr.271791.120)
Supplement: Supplemental Material [file supp_gr.271791.120_Supplementary_Table_1.xlsx]

## Sheet: broadly_expressed_genes_with_ti
Supplementary Table 1: 2,038 genes that are broadly expressed across tissues, but that show tissue-specific chromatin accessibility patterns.
common_name	peak_diversity	peak_tissue_entropy_mean_score	summary_tissue_entropy_score
unc-83	16	0.744147	2.08104
noca-1	16	0.931697	1.9564
T13H5.1	15	0.815444	1.55158
gap-2	14	0.509635	1.62506
H24G06.1	14	0.938438	1.94148
mbl-1	14	0.890514	1.57051
sms-1	14	0.77862	1.6188
fln-2	14	0.748294	1.8408
sea-2	14	0.869213	2.03267
hum-2	14	0.868561	1.80299
mca-3	13	0.882948	1.98652
unc-53	13	0.492216	1.8116
uig-1	12	0.510844	1.77599
rin-1	12	0.674944	1.93428
msi-1	12	0.945439	1.96047
vab-10	12	0.930038	2.03092
lim-9	12	0.825544	1.67954
let-765	11	0.799255	2.16164
gei-17	11	0.951493	2.12396
hmr-1	11	0.716478	1.50934
tra-1	11	0.84858	2.04716
nhr-61	11	0.974912	1.64685
mdt-15	11	0.956915	1.72983
unc-44	10	0.79526	1.51566
egl-13	10	0.527222	1.82303
rgs-7	10	0.630706	1.70543
C01G6.5	10	0.862378	2.10316
K05B2.2	10	0.827744	1.91198
C14H10.3	10	0.862051	1.80826
hlb-1	10	0.703701	1.90584
magi-1	10	0.918099	2.03594
tns-1	10	0.469167	1.84297
lec-3	10	0.860085	1.76825
F47F2.1	10	0.750625	1.52426
pqn-18	10	0.950135	2.00245
daf-12	9	0.6772	2.1196
rpoa-1	9	0.852198	2.04742
dlg-1	9	0.975974	1.89199
lst-4	9	0.838103	1.87771
ZK370.4	9	0.610282	1.91139
mec-8	9	0.963447	1.53528
hda-4	9	0.583442	1.99245
shc-2	9	0.670494	1.82907
dpy-19	8	0.865305	1.84437
T01B7.5	8	0.889813	1.99736
prmn-1	8	0.743507	1.60502
pezo-1	8	0.491205	2.00712
tsp-14	8	0.715405	1.57045
dep-1	8	0.842528	1.78143
fcho-1	8	0.754091	2.07746
T18D3.7	8	0.724423	1.60378
efk-1	8	0.957221	2.13254
pct-1	8	0.967825	1.96558
lea-1	8	0.945713	1.71907
fln-1	8	0.783139	1.61741
T04C9.1	8	0.936155	1.66545
rig-1	8	0.72585	1.86245
Y67D8A.2	8	0.897094	2.17162
sma-1	8	0.934073	1.91852
cgef-1	8	0.82071	1.8464
camt-1	8	0.704798	1.64903
mig-10	8	0.649353	1.9782
VF13D12L.3	7	0.577945	1.93538
top-2	7	0.674889	1.85483
ipp-5	7	0.760618	1.82722
vbh-1	7	0.943712	2.10732
unc-132	7	0.765665	1.96886
nhr-1	7	0.888841	1.91585
tram-1	7	0.802157	1.97838
deb-1	7	0.986007	1.88209
nhr-91	7	0.841879	1.5104
lfe-2	7	0.54225	1.90492
frm-4	7	0.963136	1.81552
daf-4	7	0.707655	1.85368
T25D10.4	7	0.879937	1.52371
Y43E12A.2	7	0.949541	1.76885
fos-1	7	0.524622	2.00006
gon-1	7	0.213276	1.71562
hsp-25	7	0.73765	2.06314
daf-2	7	0.401657	1.89771
gld-4	7	0.866398	2.07711
vab-8	7	0.515765	1.75047
ipla-1	7	0.910105	1.97241
unc-82	7	0.265932	1.51542
ptp-1	7	0.454008	1.67348
sym-2	7	0.817889	1.70596
nhr-97	7	0.929724	1.65681
cnnm-3	6	0.327508	1.87763
alh-3	6	0.868981	1.56283
trpp-8	6	0.952949	2.1318
F11D5.1	6	0.667237	1.87431
obr-1	6	0.362127	1.99149
nhr-45	6	0.823399	1.91955
F33G12.6	6	0.948465	1.77171
gdi-1	6	0.948005	1.96107
mrp-5	6	0.943049	1.5342
ZK131.11	6	0.9678	1.64256
C07B5.4	6	0.566722	1.69776
crb-1	6	0.667099	1.59199
vha-11	6	0.767073	1.80154
egl-19	6	0.877617	1.55669
sfxn-2	6	0.849922	1.97737
F26H11.4	6	0.924655	1.77339
bris-1	6	0.72063	1.86641
Y69A2AR.1	6	0.977945	2.07361
lag-1	6	0.620933	1.68695
R05G6.10	6	0.404562	1.68717
K07H8.2	6	0.962395	2.02589
lin-2	6	0.514628	1.52644
C30G4.4	6	0.689372	1.52608
F55D12.5	6	0.548854	1.52706
nmy-2	6	0.623522	2.0352
ptr-24	6	0.551675	1.5232
Y45G5AM.9	6	0.556264	2.15047
bli-4	6	0.655715	1.86801
T23B5.3	6	0.745472	1.90257
cdc-25.2	6	0.612841	1.87297
mogs-1	6	0.90537	2.08525
nkb-3	6	0.804062	1.64954
sdpn-1	6	0.39571	1.62712
T26C5.3	6	0.913311	1.67817
bre-3	6	0.526115	1.90375
ampd-1	6	0.84324	1.68272
T24B8.7	6	0.450772	2.06087
ZK858.7	6	0.782533	2.06328
W01A11.1	6	0.905096	1.73419
Y54H5A.2	6	0.362635	2.01885
T25B9.9	5	0.862715	2.05377
ifet-1	5	0.871597	2.09161
Y62E10A.13	5	0.593176	1.83168
acs-13	5	0.986486	2.10466
C02B10.5	5	0.950461	1.93359
tat-3	5	0.231049	1.5399
sqv-1	5	0.840407	1.99752
dcr-1	5	0.809202	2.02683
cdd-1	5	0.531639	1.51083
C53A5.13	5	0.983547	1.53113
pmk-3	5	0.951864	2.0113
F33H2.6	5	0.426138	1.88058
W05F2.4	5	0.475955	1.60322
ace-2	5	0.495105	1.73289
wnk-1	5	0.368726	2.10987
C17H11.6	5	0.284092	1.98479
lin-10	5	0.488931	1.79042
F54D8.6	5	0.9709	2.01805
ogdh-2	5	0.332415	1.93721
eat-20	5	0.525522	1.72202
smg-3	5	0.166208	2.0396
mcu-1	5	0.988829	1.63561
picc-1	5	0.702962	1.80595
kin-4	5	0.362127	1.87572
C56A3.6	5	0.661867	1.90758
wsp-1	5	0.51986	1.69465
afd-1	5	0.551675	1.99389
ags-3	5	0.588244	1.77554
apb-3	5	0.387994	2.08684
rhgf-2	5	0.409127	1.58211
sto-1	5	0.989187	1.66554
osta-2	5	0.354987	1.65705
dnj-24	5	0.531639	1.60483
cam-1	5	0.39571	1.78153
vha-20	5	0.396084	1.92901
prk-1	5	0.927928	1.66446
rde-12	5	0.999615	2.07497
cnt-2	5	0.693147	1.88807
F13E9.1	5	0.529676	2.16385
Y41E3.7	5	0.808672	1.61666
pole-1	5	0.840333	1.5165
egl-8	5	0	1.70609
obr-3	5	0.735214	1.7485
mrpl-50	5	0.806947	2.02474
sqv-5	5	0.301773	1.94545
ceh-18	5	0.505702	1.80774
best-13	5	0.709973	1.6019
F13H10.3	5	0.396084	2.02347
tdp-1	5	0.988122	2.01531
eel-1	5	0.670756	2.10715
hpo-27	5	0.915233	2.05912
pde-3	5	0.275655	1.58316
lin-1	5	0.599607	1.89754
T04C4.1	5	0.462098	2.10507
cit-1.2	5	0.467657	2.11745
tra-2	5	0.7558	2.08641
Y119C1A.1	5	0.679878	1.87699
inx-10	5	0.584906	1.50409
F02D8.4	5	0.329584	1.68272
K07B1.4	5	0.994307	1.73017
unc-98	5	0.808672	1.50849
sftd-3	5	0.715677	2.06097
Y71H10B.1	5	0.693147	2.01882
dhc-1	5	0.668155	2.0736
C17H12.2	5	0.599991	1.94692
anat-1	5	0.279372	1.68305
jph-1	5	0.994714	1.61395
fnci-1	5	0.701106	1.90692
eif-2A	5	0.954541	2.03053
M106.3	5	0.961424	2.09974
eri-9	5	0.69347	1.92393
ZK909.3	5	0.73873	1.5214
efl-3	5	0.975744	1.66241
tag-120	5	0.390178	1.71684
math-33	5	0.531865	2.11322
F19C6.2	5	0.701428	1.8884
npp-19	5	0.984475	1.9956
hmg-4	5	0.90902	2.03886
mca-1	5	0.484875	1.57218
C35B1.2	5	0.503518	1.92816
ptb-1	5	0.392039	1.66371
nsy-7	4	0.346574	1.88503
drp-1	4	0.962328	2.02214
dhs-13	4	0.585266	2.01767
K11D2.1	4	0.452659	2.00479
klp-12	4	0.22633	2.00189
ina-1	4	0.899586	1.70454
T03F6.3	4	0.414151	1.50225
lsm-8	4	0.622945	2.13866
ribo-1	4	0.770916	2.15584
rfp-1	4	0.50825	2.00825
cpn-1	4	0.884101	1.52851
T20D3.5	4	0.522332	1.99092
alh-7	4	0.655015	1.96867
tgt-1	4	0.939467	2.14078
B0464.6	4	0.907646	1.6602
dkf-2	4	0.0924196	1.73394
cec-10	4	0.346574	1.90399
wrt-5	4	0.751393	1.73825
brap-2	4	0.627294	2.01409
H34C03.2	4	0.978242	2.13154
ptr-21	4	0.231049	1.83417
F33D11.10	4	0.58782	1.99244
F46G10.2	4	0.783696	1.65302
mex-3	4	0.640841	1.5871
rbm-5	4	0.684609	2.10985
Y73E7A.3	4	0.585266	1.97114
Y54G2A.11	4	0.479434	1.77648
F13B12.6	4	0.664831	1.88505
C14H10.2	4	0.539783	1.67031
catp-6	4	0.570999	2.00681
hecd-1	4	0.790767	2.09676
elpc-2	4	0.985218	2.0883
C27B7.2	4	0.871434	1.93494
F55A3.2	4	0.426138	2.03294
plp-1	4	0.905878	2.06154
rgl-1	4	0.549306	2.09187
ogdh-1	4	0.923935	2.13954
gst-8	4	0.772711	1.56217
C10G8.8	4	0.861959	1.95712
rab-8	4	0.958473	1.93418
rsd-2	4	0	2.03893
kin-32	4	0.89028	1.80545
rpn-2	4	0.843351	2.12058
adr-1	4	0.832228	2.04524
W02D3.4	4	0.823959	2.03759
atg-3	4	0.677951	2.05136
rab-10	4	0.44794	1.93587
mthf-1	4	0.9971	1.89878
C35A5.8	4	0.996505	2.04171
K03B4.1	4	0.976295	1.97951
T23F2.2	4	0.534341	1.70815
K10D6.4	4	0.553837	1.72587
F56H11.2	4	0.767727	1.50963
nhr-4	4	0.585266	1.56671
zmp-1	4	0.504201	1.78594
yif-1	4	0.488272	2.1458
C56C10.7	4	0.623832	1.93188
dog-1	4	0.65205	1.71027
ife-1	4	0.898493	1.93749
nhx-4	4	0.848186	1.58902
K09F5.6	4	0.4839	1.69447
fat-4	4	0.564921	1.95042
stn-1	4	0.893732	1.79297
lrch-1	4	0.744993	1.81703
thk-1	4	0.577999	1.60885
svh-2	4	0.964017	2.05143
toe-4	4	0.426138	2.04187
catp-7	4	0.303421	1.96287
Y75B8A.6	4	0.366204	1.94696
Y54E5A.8	4	0.415888	1.5346
ile-2	4	0.697855	2.09653
pxd-1	4	0.816945	1.813
C53B4.4	4	0.579803	2.12865
suco-1	4	0.958583	1.96896
Y49G5B.1	4	0.70787	1.56768
sek-1	4	0.138629	1.70055
C05A9.2	4	0.462098	1.67122
snx-27	4	0.757276	2.03054
usp-48	4	0.512781	1.78568
prpf-4	4	0.789982	1.90706
eat-3	4	0.693147	2.10466
lin-29	4	0.554518	1.63968
Y46E12BR.1	4	0.982335	1.76151
riok-3	4	0.776253	2.12046
W09G3.6	4	0.6452	1.80951
zip-3	4	0.893045	1.65536
clu-1	4	0.634369	2.08327
T23F2.3	4	0.877045	1.55289
trpp-11	4	0.154033	2.11259
spds-1	4	0.346574	1.91657
nhr-53	4	0.51986	1.53167
scp-1	4	0.630134	2.08546
C32D5.10	4	0.786773	2.03821
prk-2	4	0.510798	1.65492
F53A10.2	4	0.277259	1.74617
ztf-22	4	0.805988	1.92041
T04H1.2	4	0.965734	2.0296
efn-2	4	0.549306	1.5506
ooc-5	4	0.758553	1.95125
Y14H12B.1	4	0.896227	1.64452
lpl-1	4	0.635611	2.08291
spv-1	4	0.138629	1.50063
sid-3	4	0.523346	1.88781
nas-39	4	0.746566	1.55285
unc-52	4	0.053319	1.86525
ech-4	4	0.941047	1.94058
eif-2alpha	4	0.686208	2.14724
ver-3	4	0.621227	1.88456
pes-4	4	0.783239	1.63023
C16E9.2	4	0.969343	1.64687
sod-2	4	0.820702	2.09119
B0198.3	4	0.224757	1.73074
ubr-1	4	0.870473	2.09107
lrp-2	4	0.770164	1.9018
eif-2Bdelta	4	0.585266	2.06981
C11H1.7	4	0.643029	1.59967
T27A3.7	4	0.635611	1.65502
pld-1	4	0.25993	2.09539
arr-1	4	0.67191	1.55808
C14C10.5	4	0.771533	2.11376
F07A11.4	4	0.664831	1.69602
vps-54	4	0.198042	2.14127
patr-1	4	0.853956	1.99455
ulp-1	4	0.156945	2.04766
gei-6	4	0.488203	1.95803
itr-1	4	0.120878	1.55364
scpl-4	4	0.664831	1.97281
pat-2	4	0.77424	1.54128
dnj-25	4	0.787152	2.03983
prp-8	4	0.919657	2.09004
B0334.3	4	0.706816	1.79616
Y47D9A.1	4	0.929755	1.90182
pmr-1	4	0.529676	1.93938
tln-1	4	0.869161	1.95359
utp-20	4	0.819379	2.0731
F47G4.4	4	0.491262	1.68307
nhr-153	4	0.982184	1.86822
pph-1	4	0.744742	1.5642
tars-1	4	0.898929	2.01556
gly-5	4	0.520237	2.05898
alh-6	4	0.987214	1.98736
Y71F9AL.10	4	0.545929	1.84121
atg-4.1	4	0.86737	1.88232
F10G8.8	4	0.74573	1.71036
F53H2.3	4	0.780073	1.79061
ippk-1	4	0.452659	2.01786
rpl-10	4	0.766262	2.11446
pqe-1	4	0.390178	2.13307
atn-1	4	0.22397	1.53542
tol-1	4	0.792168	1.96013
W01G7.4	4	0.881721	1.95616
swah-1	4	0.305476	1.72357
grh-1	4	0.380362	1.52361
F26H9.2	4	0.529676	1.91186
C53A5.6	4	0.94651	2.02753
egrh-1	3	0.433217	1.57031
kel-8	3	0.554518	1.67091
aakg-2	3	0.780355	1.77414
F46F11.1	3	0.231049	2.09705
F01D4.5	3	0.892955	1.60186
atl-1	3	0.222959	2.04905
prkl-1	3	0.346574	1.80765
acbp-1	3	0.751662	2.02515
lron-3	3	0.886537	1.58291
ebax-1	3	0	1.89742
mrpl-32	3	0.433217	2.09244
gei-13	3	0.613865	1.63707
D1007.5	3	0.506332	2.01913
ZK632.12	3	0.554518	2.03472
clsp-1	3	0.904421	1.78373
syx-7	3	0.9678	2.02484
ttb-1	3	0.554518	2.02749
itsn-1	3	0.623832	1.88506
acl-11	3	0.346574	2.02688
gck-2	3	0.433217	2.00464
gon-4	3	0.549306	1.78906
W08E12.8	3	0.867637	2.04041
R09A8.5	3	0.884698	1.86285
bath-42	3	0.955798	2.06502
blos-2	3	0.809425	1.75706
hoe-1	3	0.396084	2.00249
R10E12.2	3	0	1.62505
tbg-1	3	0.621227	1.87343
D1025.10	3	0.346574	2.05437
F29B9.8	3	0.659167	1.64594
cfp-1	3	0.590181	2.03112
F02C12.1	3	0.346574	1.67607
dgk-4	3	0.449513	1.86692
C46C2.7	3	0.780355	1.79243
C54G4.9	3	0.693147	1.76474
ncx-3	3	0.277259	1.62954
tomm-7	3	0.597253	1.9766
F59F4.3	3	0.526529	1.81299
taf-9	3	0.462098	2.01815
arrd-25	3	0.404562	1.71872
tbce-1	3	0.693524	1.99771
daf-18	3	0.471913	1.97899
K09E2.2	3	0.607068	2.00982
slc-17.4	3	0.613865	1.61034
T19D2.2	3	0.85941	1.73788
dhs-1	3	0.346574	1.92109
tag-52	3	0.997731	1.87622
F26F4.6	3	0.468213	2.02909
gtbp-1	3	0.58227	2.08282
eea-1	3	0.912113	2.06527
pqn-80	3	0.549306	2.13406
sart-3	3	0.773026	1.99224
Y43F4B.5	3	0.627135	2.10533
reps-1	3	0.346574	1.83397
F53B1.8	3	0.51986	1.85328
C33D9.13	3	0.761655	1.7964
ttr-53	3	0.568184	1.66957
nog-1	3	0.77054	2.02039
tcl-2	3	0.886441	1.7231
glp-4	3	0.946364	1.95602
T26A5.6	3	0.332415	2.03454
mrpl-19	3	0.346574	2.09961
C15H9.4	3	0.655015	1.9839
syx-3	3	0.932969	1.59614
dpm-3	3	0.924196	1.84074
coq-2	3	0.657881	2.07744
spsb-2	3	0.427667	1.66211
ubr-5	3	0.859784	2.05887
rtcb-1	3	0.935377	1.8312
mct-4	3	0.337135	1.84408
dhod-1	3	0.941668	2.05744
K07C5.2	3	0.780355	1.82383
dcaf-1	3	0.814436	2.0565
swsn-6	3	0.763871	1.93021
F52G3.1	3	0	2.0713
Y37A1A.4	3	0.780355	1.61948
sulp-8	3	0.786019	1.84891
F27C1.6	3	0.746193	2.1087
cdc-5L	3	0.470834	2.06674
vps-26	3	0.982479	1.84409
T10F2.2	3	0.716704	1.93454
ran-3	3	0.863601	1.97589
vpat-1	3	0.549306	1.53613
C16A3.4	3	0.478924	2.12878
sma-4	3	0.50703	1.83024
K01A11.3	3	0.452659	1.50807
Y50D4A.4	3	0.616131	2.10282
swan-2	3	0.346574	1.98062
rbbp-5	3	0.778364	1.61795
F23F12.3	3	0.659167	1.56055
F54C9.9	3	0.763871	1.96706
trpa-1	3	0.731563	1.70693
nhr-11	3	0	1.73713
ztf-6	3	0.992382	1.91842
henn-1	3	0.647389	1.85804
gly-10	3	0.85316	1.95622
polq-1	3	0.77054	1.56138
pabp-2	3	0.628361	2.09862
npp-10	3	0.244466	2.06249
Y73B3A.1	3	0.346574	1.58176
alx-1	3	0.880679	1.96142
rrf-1	3	0.610118	1.9763
H35B03.2	3	0	1.85636
D1005.2	3	0.173287	1.83162
M01A8.1	3	0.569855	1.59245
F09E10.5	3	0	1.5629
cid-1	3	0.198042	1.9231
F16F9.4	3	0.759806	1.61573
ddr-1	3	0.597253	1.82354
C05D11.9	3	0	1.95132
tbc-17	3	0.65205	1.98841
F56A8.9	3	0.818487	1.97922
ddx-15	3	0.903523	2.04506
ngp-1	3	0.823709	2.10856
nhr-209	3	0.659167	1.90054
Y32H12A.8	3	0.536479	2.04919
W06F12.3	3	0.51986	1.52218
mif-2	3	0.786019	1.98068
F54C8.7	3	0.346574	1.8839
ZK643.5	3	0.991535	2.05283
slc-17.7	3	0.337135	1.50788
T09A5.5	3	0.231049	1.87885
hrdl-1	3	0.332415	1.94061
nkcc-1	3	0.106638	1.82149
F58G1.2	3	0.462098	1.90478
Y53G8B.1	3	0.415888	1.78348
gei-1	3	0.308367	2.02328
saps-1	3	0.929248	2.04383
yap-1	3	0.924648	1.91307
zipt-7.1	3	0.297063	1.50006
tsn-1	3	0.452659	2.04036
abcf-2	3	0.488203	2.10579
C18E9.5	3	0.115525	1.73633
T19B4.3	3	0.744395	1.7502
rde-8	3	0.486478	1.82847
M02E1.1	3	0.967018	1.9177
C11E4.6	3	0.173287	1.6952
add-2	3	0.487015	1.78212
T19D12.6	3	0.680465	1.70889
Y53C12B.1	3	0.687969	2.02518
emb-30	3	0.577945	2.0748
dhhc-2	3	0.346574	1.83758
sod-4	3	0.759806	1.55744
W07G4.5	3	0.888801	1.52173
Y69A2AR.18	3	0.735609	2.1255
snfc-5	3	0.346574	2.04286
dhcr-7	3	0.780355	1.62025
Y71H2AM.4	3	0.433217	2.00213
T07C4.12	3	0.873934	2.00849
lact-9	3	0.41291	2.1153
lin-54	3	0.815642	1.53784
pcaf-1	3	0.346574	2.01604
mus-101	3	0.880237	1.69595
gfm-1	3	0.77424	1.99647
hipr-1	3	0.780355	1.82527
sptf-3	3	0.668876	2.09678
apc-2	3	0.405065	1.82201
F30F8.9	3	0.577945	2.01287
golg-2	3	0.454008	2.11044
W02F12.4	3	0.813394	2.0326
C34B4.4	3	0.91287	1.62241
F28F8.7	3	0.25993	2.01166
usp-5	3	0.366204	2.11782
rft-2	3	0.709973	1.95354
C04F12.1	3	0.675109	1.85157
F30F8.10	3	0.277259	1.87496
prx-2	3	0.554518	1.52464
Y34D9A.3	3	0.687134	1.62023
nsy-1	3	0	1.98014
F26F4.5	3	0.346574	1.75449
cif-1	3	0.216608	2.12429
F29B9.1	3	0.35164	1.57391
him-1	3	0	1.94924
mrps-34	3	0.797797	2.10516
C08F8.2	3	0.216608	2.11742
npp-14	3	0.380878	1.94043
Y47G6A.18	3	0.715281	1.95313
T14B4.3	3	0.659167	1.81259
drh-1	3	0.972955	2.05644
C23G10.7	3	0.377008	1.81723
C46F11.6	3	0.943348	1.64491
rha-1	3	0.277259	1.98297
smp-2	3	0.799091	1.8194
hcf-1	3	0.607068	1.94597
nyn-2	3	0.428948	1.91055
efhd-1	3	0	1.63228
cpt-6	3	0.277259	1.64704
clec-89	3	0.337135	1.55004
ZC190.5	3	0.274653	1.50084
Y53C12B.7	3	0.543191	1.7862
ggtb-1	3	0.99021	1.89279
set-17	3	0.630292	1.7248
Y48G10A.1	3	0.44322	2.04138
Y97E10AR.3	3	0.933651	1.7512
bet-1	3	0.659167	2.1442
nhr-119	3	0.621875	1.96312
C26E6.12	3	0.543191	1.77344
mfn-1	3	0.62699	2.0816
C36A4.4	3	0.780355	1.90099
odr-4	3	0.840887	1.66841
C25H3.14	3	0.808672	1.74162
pus-1	3	0.6726	2.01442
nhr-116	3	0.774692	1.61699
F25F8.1	3	0.277259	1.82955
imb-1	3	0.554518	1.94374
trcs-2	3	0	1.96716
mms-19	3	0.346574	2.07306
vab-2	3	0.231049	1.85774
Y37E11AL.3	3	0.346574	1.52259
F36G3.1	3	0.894132	1.70311
tbc-13	3	0.277259	2.12369
glo-2	3	0	2.03171
cdc-37	3	0.41291	2.02505
rbm-28	3	0.554518	2.00714
acl-6	3	0.483308	1.86198
gcy-12	3	0.51986	1.92944
frm-8	3	0.724747	1.59414
R12C12.9	3	0.277259	1.79774
C28H8.3	3	0.383098	2.12365
eftu-2	3	0.433217	2.11478
fars-2	3	0.879686	2.04911
age-1	3	0	2.0957
calu-2	3	0.346574	1.8142
ifg-1	3	0.47954	2.0899
F53E4.1	3	0.565819	1.86238
nstp-1	3	0.22161	1.84548
pdha-1	3	0.563464	2.12902
trr-1	3	0.304038	2.05869
mcrs-1	3	0.627632	2.03906
let-858	3	0.99021	2.04947
Y45G12B.3	3	0.972955	1.78487
dis-3	3	0.804719	1.99299
egl-26	3	0.346574	1.76009
smg-6	3	0.462098	2.06681
nhr-138	3	0.668876	1.61973
H12D21.10	3	0.99021	1.5398
W06A7.4	3	0.346574	1.74322
ddx-19	3	0.471045	1.74177
gale-1	3	0.346574	1.99972
crls-1	3	0.793611	2.03398
Y45F10A.7	3	0.814025	1.72015
lpd-3	3	0.462098	2.05077
W09C3.4	3	0.792168	1.77536
Y67H2A.2	3	0.981203	1.95636
ZK1127.5	3	0.547268	1.91066
fat-1	3	0.97748	2.03853
uso-1	3	0.935437	2.1684
Y39B6A.34	3	0.786019	1.99559
tpa-1	3	0.574799	1.94707
Y57E12AL.1	3	0.628361	2.10209
kgb-1	3	0.607698	2.08574
mtch-1	3	0.763656	2.0926
pst-1	3	0.577945	1.96256
nhr-76	3	0.277259	1.58591
npp-22	3	0.977323	1.69955
lin-23	3	0.616131	2.10218
rlbp-1	3	0.594126	2.10262
F09G2.8	3	0.554518	1.70906
che-10	3	0.346574	1.60311
abcf-1	3	0.247553	2.13407
chw-1	3	0.231049	1.50585
dars-1	3	0.852441	2.1324
F40F8.11	3	0.570826	1.99006
nhr-162	3	0.944203	1.69966
C25H3.9	3	0.769382	2.04057
Y47D3A.20	3	0.346574	2.06274
vrk-1	3	0.231049	1.75117
ptp-2	3	0.643959	1.97195
T28H10.1	3	0.828302	1.91714
C27H6.8	3	0.625946	2.02185
capg-1	3	0.433217	2.04485
gon-14	3	0.788303	2.07298
ate-1	3	0.621227	2.11838
acs-11	3	0.77728	2.05839
F11G11.5	3	0.173287	1.93152
K02C4.3	3	0.894132	1.98728
sap-49	3	0.277259	2.10897
mut-16	3	0.630665	1.9029
eif-1	3	0.405065	2.03703
let-418	3	0.854443	2.0999
mrp-1	3	0.346574	2.02717
F30A10.3	3	0.280882	1.86096
C46F11.5	3	0.57253	1.94199
ulp-2	3	0.945252	1.97975
rei-1	3	0.942776	1.64337
moc-2	3	0.712778	1.70099
C15C7.5	3	0.577623	1.71802
dtmk-1	3	0.543191	1.63364
T25F10.3	3	0.346574	1.62901
T25G3.3	3	0.6452	2.0897
ima-1	3	0.89626	1.77859
F48E3.2	3	0.138629	1.55587
C37C3.2	3	0.621227	2.03616
mdt-8	3	0.277259	2.00383
fkb-8	3	0.557917	1.99172
rpom-1	3	0	1.9548
puf-12	3	0.833961	2.04427
H06I04.6	3	0.850414	1.91076
C23G10.8	3	0.915326	2.10874
F23H11.5	3	0.866999	2.09145
M03B6.4	3	0.346574	1.91089
Y76A2B.4	3	0.763258	2.12839
hpo-19	3	0.77728	2.12301
ttm-1	3	0.752125	1.88694
F52E1.9	3	0.567348	1.76421
lst-6	3	0.948828	1.94582
erfa-1	3	0.537843	2.14258
gmeb-1	3	0.549306	2.02899
Y61A9LA.1	3	0.993717	1.53503
F59B10.4	3	0.504107	1.60825
pxl-1	3	0.549306	1.75915
C13F10.5	3	0.99021	2.11845
sut-2	3	0.792168	2.10542
eif-2Bepsilon	3	0.566296	2.09203
trpp-10	3	0.41198	1.98317
F39G3.3	3	0.876909	2.11576
ran-2	2	0.505702	2.04056
ZK686.3	2	0.462098	2.11199
cmt-1	2	0.462098	1.89781
C29E4.13	2	0.462098	1.94596
raga-1	2	0.332415	2.08787
kle-2	2	0	1.99404
C45E5.1	2	0.462098	1.75213
ZK1236.1	2	0.712778	1.88233
tag-281	2	0.346574	1.84015
iars-1	2	0	2.11717
T20G5.9	2	0.982523	2.05052
lap-1	2	0.568184	2.1606
qns-1	2	0.462098	1.97297
eri-6	2	0.181064	1.96685
Y55D5A.1	2	0	1.62938
ctr-9	2	0	2.0238
C14B1.8	2	0.647389	1.93888
W03C9.1	2	0.89588	1.57238
soem-1	2	0.462098	1.70578
tftc-5	2	0	1.95546
W09G3.1	2	0.173287	1.92154
mtx-2	2	0	1.97674
Y69A2AR.16	2	0.346574	2.11195
dnj-27	2	0	1.78422
npp-21	2	0.462098	1.8201
R06F6.12	2	0.47229	1.79053
F40F8.3	2	0.366204	1.59452
B0280.9	2	0.712778	1.97611
taf-6.2	2	0.462098	1.86683
C35B1.5	2	0.91591	1.84776
dcap-1	2	0.792168	1.98024
algn-1	2	0	1.97419
spd-3	2	0	1.9075
C23G10.2	2	0.823959	1.7348
Y40D12A.1	2	0.809236	1.81687
F20H11.1	2	0.22161	2.0316
cyn-6	2	0.462098	1.94365
swd-2.2	2	0.823959	1.85439
rab-6.1	2	0.767897	1.50243
dpy-18	2	0.462098	1.8048
T01B6.1	2	0	1.6155
emb-27	2	0	1.78132
rom-1	2	0.717844	1.78589
R12B2.2	2	0.462098	1.95988
C24D10.4	2	0.924196	1.99365
ZK1010.8	2	0.462098	1.79526
C35D10.6	2	0	1.87704
clp-2	2	0.924196	1.83258
asb-1	2	0.346574	1.5592
cisd-3.1	2	0.693147	2.04412
rars-1	2	0	2.17445
trpa-2	2	0.936426	1.57983
lpd-6	2	0.693147	2.04425
rde-1	2	0.219722	2.06297
mspn-1	2	0.173287	2.023
W05B10.4	2	0	1.84744
T19C3.4	2	0.936426	2.12601
trx-2	2	0.346574	1.86668
C15C8.4	2	0.924196	1.97016
tftc-3	2	0.099021	1.89656
nrde-1	2	0.337135	2.02568
ddx-23	2	0.823959	1.99384
igeg-1	2	0	1.80818
dpf-4	2	0.332415	2.05374
dnpp-1	2	0.75894	1.99262
arl-1	2	0.549306	2.02548
F54F2.7	2	0	1.92315
ppfr-4	2	0.823959	1.73446
tfbm-1	2	0	2.1173
laf-1	2	0.462098	2.13517
mppa-1	2	0.462098	2.11217
T20F5.7	2	0.462098	1.91182
Y6D1A.1	2	0.346574	1.82619
morc-1	2	0.574609	1.57791
gop-1	2	0.51986	2.00721
ztf-8	2	0.251096	1.9705
mes-2	2	0.396084	1.93462
pqn-83	2	0.173287	1.56186
ZC247.1	2	0.732408	1.89761
sand-1	2	0.462098	1.80733
R02F2.7	2	0.346574	1.9417
tag-175	2	0.77424	2.00564
Y105E8A.3	2	0.231049	2.10348
pod-1	2	0.554518	1.82791
rpl-36.A	2	0.462098	2.12625
dro-1	2	0.231049	1.63255
dhs-12	2	0.404562	1.82632
fnta-1	2	0.486478	1.96007
ubq-2	2	0.346574	2.12173
lpd-8	2	0.823959	2.00174
R102.4	2	0.462098	1.81982
F17A9.5	2	0.462098	1.50475
icln-1	2	0.462098	2.04882
npp-23	2	0.346574	2.05079
dnj-17	2	0.332415	1.75365
gst-20	2	0.559258	1.66087
R74.7	2	0.828302	2.02882
Y47G6A.21	2	0.823959	1.92057
dnj-11	2	0.51986	1.93953
F10E9.4	2	0	2.00006
odr-8	2	0.231049	1.90917
sam-4	2	0.693147	2.03579
C01G5.5	2	0.198042	1.82148
wht-1	2	0.346574	1.59776
ipla-7	2	0.280882	1.63612
mccc-1	2	0.51986	1.92362
otub-3	2	0	1.9643
mutd-1	2	0.896065	1.86257
rgr-1	2	0	2.10729
cec-4	2	0	1.94244
cysl-3	2	0.462098	1.65448
M04F3.3	2	0.549306	1.62095
trpp-3	2	0.462098	1.98978
emc-6	2	0.998505	1.92986
mrpl-23	2	0.907623	2.00769
sec-10	2	0	2.10153
tag-321	2	0.44322	1.94343
moc-3	2	0.462098	1.85904
F42G8.10	2	0.346574	2.10088
acdh-13	2	0.470834	1.90298
rap-2	2	0	1.79672
ddi-1	2	0.823959	2.04804
B0336.7	2	0.231049	1.90973
lgg-3	2	0.549306	1.92923
F32E10.5	2	0	1.9381
M04F3.2	2	0.776707	1.5688
pars-1	2	0.712778	2.13895
eri-7	2	0.346574	1.78418
cblc-1	2	0.346574	1.62873
mel-28	2	0.892222	1.71455
mmaa-1	2	0	2.0798
C03H5.3	2	0.462098	2.01087
T02H6.1	2	0	2.11985
sqv-7	2	0	1.87427
Y51H7BR.4	2	0	1.62996
F54B3.1	2	0	2.04126
K10G6.9	2	0.943827	1.56075
ZK1067.3	2	0.823959	1.59385
Y54H5A.1	2	0.265932	1.92675
M176.4	2	0	1.70486
magu-1	2	0.277259	1.81408
eif-3.F	2	0	2.11743
toe-1	2	0.156945	2.04456
Y53C10A.5	2	0	1.58037
hsf-1	2	0.823959	2.04917
rpia-1	2	0.867187	1.93471
Y57A10A.13	2	0.462098	1.86893
arx-6	2	0.831777	1.8524
alh-11	2	0	2.03448
R166.3	2	0.462098	1.88711
gcc-2	2	0	1.98281
duo-3	2	0.752125	2.02041
hpo-35	2	0.924196	2.02894
F46C5.9	2	0.468327	2.08415
rict-1	2	0.44322	1.88057
C18A3.3	2	0	2.04726
cra-1	2	0.892222	2.10831
cpna-1	2	0.823959	1.59017
rpl-33	2	0.536479	2.09396
Y82E9BR.14	2	0.346574	2.14616
F43E2.1	2	0	1.99082
ugtp-1	2	0.866434	1.97988
ung-1	2	0.549306	1.65913
Y110A7A.9	2	0.798313	1.9749
fbxa-13	2	0.823959	1.94135
Y22D7AL.4	2	0.659167	1.58174
elpc-1	2	0.532209	1.99779
R53.4	2	0.838117	2.1153
dmd-10	2	0.346574	1.54445
Y92H12A.2	2	0	1.77312
Y59A8B.8	2	0.531865	2.00973
F43G9.4	2	0	1.96684
Y92H12BL.1	2	0	2.0986
srt-42	2	0	1.78677
C04F12.8	2	0.462098	1.54278
ugt-64	2	0.462098	1.81361
R07H5.11	2	0.462098	2.08954
pes-9	2	0.809519	1.91103
F43G9.13	2	0.462098	1.62388
Y60A3A.8	2	0.924196	1.93789
F56G4.6	2	0.924196	1.91954
drh-3	2	0.659167	1.69455
C10E2.2	2	0	2.02975
T10C6.6	2	0.324772	2.0473
ego-2	2	0.659167	2.13352
sftb-2	2	0.635385	2.05376
set-26	2	0.274653	2.13192
atx-3	2	0.346574	1.62788
sumv-1	2	0.855333	1.91019
F26A3.1	2	0.732408	2.09511
sec-23	2	0	2.11292
C49F8.1	2	0.462098	1.58495
ttr-54	2	0.982184	1.64063
F53E10.6	2	0.462098	1.91667
wrn-1	2	0.366204	1.78812
algn-13	2	0.89588	1.76225
sao-1	2	0.212171	2.01827
sesn-1	2	0.346574	1.86804
mel-46	2	0.274653	2.0511
B0001.4	2	0.462098	1.88392
pas-1	2	0.332415	2.01532
dhs-22	2	0.393235	2.08132
F39B2.3	2	0.951284	1.95704
Y49A3A.3	2	0.462098	2.00633
acdh-10	2	0.981544	1.89045
wrb-1	2	0.693147	2.14709
C47E12.3	2	0.332415	2.06222
T01H8.2	2	0.789794	1.96502
nhr-70	2	0.346574	1.8601
prp-6	2	0	2.15259
snx-6	2	0	2.08839
R02F2.9	2	0.936426	2.06383
B0361.6	2	0.831777	1.83416
Y48G1C.9	2	0.462098	1.90779
F53F1.6	2	0	1.50903
syx-18	2	0.313871	2.08407
Y52B11A.3	2	0.462098	2.11362
acl-5	2	0.99687	1.76683
Y61A9LA.10	2	0.346574	2.0373
F55F8.3	2	0.981535	1.99681
ncs-4	2	0.277259	1.51346
F53F4.10	2	0.972955	2.17199
Y41E3.1	2	0.231049	2.05621
R53.5	2	0.684128	2.02059
clec-264	2	0.346574	1.52505
Y61A9LA.3	2	0.277259	2.11583
F53F1.3	2	0.265932	1.87302
F54D11.4	2	0.346574	1.96439
T06E6.1	2	0.44322	2.01167
nhr-55	2	0.967018	1.66658
nhr-5	2	0	1.61444
ZK1098.6	2	0.804719	1.66234
mrps-9	2	0.659167	2.15146
gcy-34	2	0.462098	1.58994
tsfm-1	2	0.332415	2.04305
pssy-1	2	0.943827	2.03284
mrps-5	2	0	2.16835
sumv-2	2	0.732408	2.10201
Y54F10BM.13	2	0.332415	1.69493
usip-1	2	0.804719	1.99203
K03B4.2	2	0.44322	2.0141
R11D1.1	2	0.462098	1.96405
Y116A8C.30	2	0.855333	2.01534
nhr-15	2	0.823959	2.09622
pnk-4	2	0.462098	1.66375
unc-60	2	0.277259	2.00989
alh-10	2	0.823959	1.72734
denn-4	2	0	2.11565
mpst-1	2	0.855333	1.90794
Y43F4B.7	2	0.924196	1.98648
nhr-286	2	0.792168	1.94488
K07A12.5	2	0.404562	1.60901
chd-7	2	0	2.12595
F27D4.6	2	0.924196	2.06473
C01G10.9	2	0.366204	1.97331
crb-3	2	0	1.69546
clh-6	2	0.505702	2.06976
C49C8.2	2	0.462098	1.65362
cyp-33E2	2	0.462098	1.61248
ccpp-1	2	0	1.98186
F25B4.5	2	0	1.98293
slcf-2	2	0	1.70297
ZK287.7	2	0.809425	1.81179
usp-33	2	0.462098	2.11849
W03H9.1	2	0	1.5364
nhr-203	2	0.277259	1.77344
dnj-3	2	0.789794	1.7933
F52E10.4	2	0	1.66857
Y57G11C.3	2	0.732408	1.62725
secs-1	2	0	1.9296
nhr-184	2	0.823959	1.91992
rpl-11.2	2	0.346574	2.11073
B0564.7	2	0	2.02947
hpo-12	2	0	1.94513
C42C1.12	2	0.346574	1.79589
skp-1	2	0.404562	2.04621
rnp-1	2	0.265932	2.10733
uggt-2	2	0.828302	1.9002
B0511.6	2	0	2.06246
R08B4.3	2	0.462098	2.00726
F52B11.2	2	0.828302	1.8858
F26A10.2	2	0.462098	1.8537
rpl-30	2	0.693147	2.1257
ppfr-2	2	0.924196	1.99716
nas-36	2	0	1.7333
F16H11.1	2	0.462098	1.63779
ztf-4	2	0.346574	2.09545
spin-1	2	0.794513	1.58777
C06A5.3	2	0.897139	2.07063
sir-2.4	2	0	2.01674
dnj-19	2	0.456179	2.14796
Y57G11C.36	2	0.404562	1.85131
acr-10	2	0	1.64308
hhat-2	2	0.274653	1.60979
xpg-1	2	0	1.95735
qars-1	2	0.288973	2.14914
gst-42	2	0.823959	1.56367
F19F10.9	2	0.41198	1.96508
mtp-18	2	0.337135	1.79861
scm-1	2	0.462098	2.04701
F52A8.1	2	0.531865	1.56117
vars-1	2	0.792168	1.98935
F25G6.9	2	0.972955	2.00126
mrpl-13	2	0.823959	1.98442
T23B3.2	2	0.332415	1.51585
sid-1	2	0.462098	1.69036
rba-1	2	0.505702	1.98243
F55H12.2	2	0.914743	1.56074
Y116A8C.13	2	0	2.02819
pole-2	2	0	1.89753
R11H6.5	2	0.536479	1.91804
lsy-13	2	0.366204	1.93415
F13D2.1	2	0.231049	1.51986
hda-1	2	0.265932	2.06856
W02D3.12	2	0.963457	1.8117
bca-2	2	0	2.0263
leo-1	2	0.219722	1.84473
spt-5	2	0.178826	2.15172
tap-1	2	0.866434	1.97985
C54G4.7	2	0.44322	2.0121
T15B7.15	2	0.982523	1.54956
tag-115	2	0.828302	1.90707
C26F1.3	2	0.173287	1.95349
zhit-3	2	0.549306	1.94551
R08E3.3	2	0.924196	2.10563
trpp-6	2	0.659167	1.88881
angl-1	2	0.823959	2.01313
him-6	2	0.462098	1.53086
ndx-9	2	0.346574	1.75879
scbp-2	2	0.462098	1.68687
soap-1	2	0	1.57242
dod-18	2	0.66609	1.92944
prx-12	2	0.823959	1.67527
jamp-1	2	0	2.01328
tgt-2	2	0.346574	2.02376
F19G12.10	2	0.693147	1.64055
R02F11.4	2	0.89588	2.0836
oac-50	2	0.891131	1.53787
Y43B11AR.3	2	0.732408	1.94087
praf-3	2	0.936426	1.63838
dhhc-7	2	0.194591	2.13624
Y92H12A.5	2	0	2.10751
C27F2.9	2	0.982184	2.03756
prp-19	2	0.402359	2.0705
unc-93	2	0.462098	1.56436
Y105E8A.13	2	0.659167	1.59053
Y53H1A.2	2	0.549306	1.92648
fcp-1	2	0.549306	1.91436
har-1	2	0.855333	2.15143
K07A1.3	2	0	1.8465
homt-1	2	0	1.97514
Y52B11A.10	2	0.173287	1.9609
imp-1	2	0.231049	2.02672
R03H10.6	2	0.982184	1.65843
lmd-1	2	0.173287	1.8486
dct-6	2	0.462098	1.74571
cyk-3	2	0.689138	2.05979
tat-5	2	0.51986	2.10895
C43H6.4	2	0.346574	2.1177
C01F1.6	2	0	1.92038
Y105E8A.28	2	0	1.69764
szy-2	2	0	1.92799
Y105E8A.14	2	0.404562	1.90876
hpo-13	2	0	2.07449
C09D4.4	2	0.173287	1.73798
rtel-1	2	0	1.73139
B0286.1	2	0	1.69821
Y54E5A.5	2	0.823959	1.99123
F17C8.3	2	0.462098	1.64524
pbs-2	2	0.910038	2.12549
R12C12.7	2	0.792168	2.00378
F25H2.7	2	0.693147	2.01622
fce-1	2	0.549306	2.07451
imb-2	2	0.804719	2.07289
Y48G1C.10	2	0.346574	2.09507
frpr-19	2	0.224757	1.62104
Y47G6A.22	2	0.531865	1.99605
gcn-2	2	0.659167	1.90962
drsh-1	2	0.346574	1.93296
F33H2.2	2	0.9678	1.83952
E01A2.5	2	0.346574	1.85122
C05D11.5	2	0.659167	1.59056
Y87G2A.13	2	0	2.05702
F27D4.4	2	0	2.13636
K07H8.9	2	0.173287	1.60509
cyn-15	2	0.346574	2.06113
uev-3	2	0	1.92852
K09C4.10	2	0.554518	1.80773
Y23H5A.2	2	0.51986	1.90771
W02A11.1	2	0	2.01238
T23G5.2	2	0.44322	1.91555
F59A3.2	2	0.346574	1.67975
pars-2	2	0.426138	2.03614
sec-6	2	0.462098	2.12881
prx-11	2	0.846595	1.72478
T26C12.1	2	0.462098	1.95176
Y53F4B.19	2	0	1.69531
R10H1.1	2	0.997246	1.52077
F09E5.7	2	0.558745	2.00858
W05E10.1	2	0	1.57948
rpb-10	2	0.89588	2.00363
elf-1	2	0	2.03787
strm-1	2	0.933255	1.53247
snpc-1.1	2	0.346574	1.52934
mat-2	2	0.823959	1.82895
lrr-1	2	0	1.65752
atm-1	2	0	1.69101
nhr-104	2	0.924196	1.95844
zyg-12	2	0.462098	1.96465
miro-1	2	0.804719	2.11878
C05D12.7	2	0.346574	1.57242
frl-1	2	0.823959	2.05534
pup-2	2	0.231049	2.09895
gls-1	2	0	2.01776
C53H9.2	2	0.415888	1.89461
ZK1307.8	2	0.693147	2.12491
tag-151	2	0.337135	2.1366
F25H2.12	2	0.346574	1.79123
R05H5.3	2	0.823959	1.87234
ZK1248.13	2	0	1.92966
stip-1	2	0	1.86057
die-1	2	0.462098	1.65599
chl-1	2	0.536479	1.56631
tag-51	2	0.804719	1.68665
npp-9	2	0.826966	1.87057
ZK1127.3	2	0.866434	2.00559
ran-5	2	0.965939	1.86934
art-1	2	0.823959	2.1423
2021-03-04	2	0.823959	1.56357
bub-3	2	0.44322	1.87607
Y54G9A.7	2	0.332415	2.06707
gst-24	2	0.462098	1.88328
mff-1	2	0.462098	2.02455
set-10	2	0.823959	2.03069
mop-25.2	2	0	2.05382
Y71F9AR.2	2	0.462098	1.84728
W10C8.5	2	0.568184	1.78208
moag-4	2	0.866999	2.04492
Y71F9AL.12	2	0.44322	1.93754
rpl-2	2	0.173287	2.14992
fkb-6	2	0.44794	2.08017
Y48C3A.18	2	0	1.89073
slc-25A32	2	0.346574	1.95055
hst-1	2	0.693147	1.97632
rrf-3	2	0.41198	1.83101
prmt-1	2	0.389182	1.81366
rer-1	2	0.812494	2.08927
F07H5.10	2	0	1.72649
alkb-8	2	0.823959	2.04359
C27B7.6	2	0	1.52496
fut-3	2	0	1.89254
ztf-3	2	0.823959	1.94322
mrps-30	2	0.462098	2.13468
Y39G10AR.9	2	0.659167	2.04256
tbp-1	2	0.277259	1.95854
R03E9.2	2	0.346574	1.54012
clec-266	2	0.173287	1.68098
tpst-1	2	0.462098	2.08198
tyms-1	2	0.231049	1.5413
acbp-5	2	0.404562	1.97883
ZK792.1	2	0.462098	1.91293
nud-1	2	0.274653	1.88728
F34H10.3	2	0	1.89081
ham-3	2	0	2.05222
Y67D8C.3	2	0.277259	1.70077
T05G5.5	2	0.915177	1.78077
mct-3	2	0.659167	2.11195
blos-1	2	0.462098	1.9406
kcc-1	2	0	1.98891
W09D10.4	2	0.935426	2.09121
sbp-1	2	0.231049	1.76229
nhr-123	2	0.89588	1.64814
ula-1	2	0.866434	2.02948
ric-8	2	0.337135	2.06641
mat-3	2	0	1.89699
hmt-1	2	0.44322	1.90161
smg-9	2	0	2.00594
K01G5.10	2	0.866434	1.95532
cyp-33E1	2	0.982523	1.73502
acr-20	2	0	1.5455
R151.8	2	0.462098	1.94068
Y41D4B.4	2	0	1.91578
spl-1	2	0.332415	2.05188
ZC262.2	2	0.582623	2.10856
mett-10	2	0.804719	1.66914
pnk-1	2	0.404562	1.5708
rps-18	2	0.549306	2.12754
C14C10.2	2	0.693147	1.79542
cil-1	2	0.187445	2.01455
met-2	2	0.140584	2.11763
cids-1	2	0.389182	2.05324
cpi-1	2	0.693147	1.54595
cox-15	2	0.505702	2.10376
npp-15	2	0.115525	1.82198
nuaf-3	2	0.462098	2.1026
sem-2	2	0	1.75839
C09E7.8	2	0.198042	1.75122
psr-1	2	0.487015	1.97289
unc-34	2	0.823959	1.7574
snr-6	2	0.809236	2.0172
C23G10.5	2	0.462098	1.77608
mrps-10	2	0.534583	1.82261
Y49E10.16	2	0.346574	1.7488
tftc-1	2	0	2.14787
C13E3.1	2	0	1.62343
pph-4.2	2	0.659167	1.79903
M01G5.1	2	0.366204	1.8223
hlh-8	2	0.277259	1.76052
cul-6	2	0.982523	1.8013
M04B2.2	2	0.924196	1.91563
C46H3.2	2	0	1.80034
gsk-3	2	0	2.00155
nst-1	2	0.965553	1.9898
frm-5.1	2	0.505702	1.74026
piga-1	2	0.809236	1.75802
ctg-2	2	0.337135	1.58892
misc-1	2	0.924196	2.12949
F56F11.2	2	0.462098	1.83647
Y55D5A.3	2	0.404562	1.53437
C50F2.2	2	0	1.83142
Y75B8A.16	2	0.872592	1.6362
impt-1	2	0.659167	1.81377
K09E9.3	2	0.972955	1.95749
C50D2.10	2	0.346574	1.88924
klp-3	2	0.732408	1.51804
T23D8.3	2	0.346574	2.06107
gip-2	2	0	1.78166
exl-1	2	0.346574	1.74247
adpr-1	2	0.321888	1.9361
col-71	2	0.809627	1.76135
pes-5	2	0.823959	1.95624
F57C9.4	2	0.462098	1.89374
W08F4.3	2	0.919679	1.9024
ZK430.7	2	0.823959	2.07633
pdpr-1	2	0.693147	2.07963
xpo-2	2	0.878749	1.85471
mrpl-16	2	0.462098	2.13402
ears-1	2	0	1.99313
lonp-1	2	0.346574	2.12129
fgt-1	2	0.462098	1.86603
jtr-1	2	0.346574	2.01507
vha-3	2	0.751135	1.84587
F44E2.6	2	0.462098	1.97392
wdr-48	2	0.648637	1.89244
mdt-17	2	0.549306	2.00901
dpf-7	2	0.366204	2.0725
yars-2	2	0.924196	1.88495
E01A2.2	2	0.439445	1.98488
ech-3	2	0.505702	1.91027
tag-307	2	0.404562	1.98675
ZK1058.3	2	0.231049	1.93013
T03F1.12	2	0.549306	1.71776
rpb-2	2	0.346574	2.12926
cdc-73	2	0.366204	2.01114
Y37E11B.1	2	0	1.93776
mrpl-2	2	0.44322	2.10618
cogc-5	2	0	2.06236
F56B3.4	2	0	1.99715
K11H12.1	2	0	1.71246
rnf-121	2	0.804719	2.05914
pdhb-1	2	0	2.09101
vms-1	2	0	2.01834
M4.1	2	0.470834	2.03885
lec-12	2	0.953077	2.09283
C53A5.2	1	0	1.55316
rps-16	1	0	2.11417
Y32B12B.4	1	0	1.57568
aqp-6	1	0	1.65071
Y39B6A.37	1	0	1.75312
Y51A2A.5	1	0	1.80852
C37A2.6	1	0	1.74965
F55D12.2	1	0	1.57724
eme-1	1	0	1.76407
C53A5.16	1	0	1.89969
M04C9.3	1	0	1.78816
dhs-24	1	0	2.11392
Y60A3A.19	1	0	2.13308
Y37H2A.1	1	0	2.03101
slr-2	1	0	1.98128
Y59A8B.21	1	0	1.71848
usp-50	1	0	2.11918
sel-11	1	0	2.16303
nhr-140	1	0.693147	1.67405
trm-1	1	0	1.98421
nhr-139	1	0	1.84052
F10C2.5	1	0	2.01684
par-4	1	0	2.01817
T05H4.10	1	0.693147	2.15634
pitr-2	1	0	1.57553
F23B12.7	1	0	2.07089
C50F4.16	1	0	2.02524
rtfo-1	1	0	1.95063
prp-38	1	0	2.07739
C50F4.12	1	0	1.78699
trpp-4	1	0.693147	1.86485
F36A2.2	1	0.664831	2.11656
zig-11	1	0	1.84244
cft-1	1	0	1.55729
crn-2	1	0	2.14609
pgp-8	1	0	1.97153
C24G6.8	1	0	2.106
pigv-1	1	0	1.71797
C05C8.5	1	0	1.90291
Y73B3A.20	1	0.664831	1.97096
nrde-3	1	0.693147	2.02898
mdt-6	1	0	1.93525
algn-7	1	0	1.93754
cyp-33C12	1	0	2.0124
let-611	1	0.693147	1.96954
R05D7.7	1	0	1.54004
C25D7.10	1	0	1.98816
C13F10.7	1	0	1.87769
sod-3	1	0	1.60913
D1054.3	1	0.693147	2.08047
C27D8.4	1	0	1.90039
rde-11	1	0	1.79535
sec-24.2	1	0	2.14784
ZK795.3	1	0.693147	1.94458
nstp-4	1	0.693147	2.04112
aipr-1	1	0.67427	1.93972
mrpl-45	1	0.693147	2.06278
cog-1	1	0	1.6033
sam-10	1	0	2.09716
M106.8	1	0.693147	1.70861
F55F3.4	1	0.67427	1.56936
D1081.3	1	0	1.7597
C30F2.5	1	0	1.68894
sago-1	1	0	1.80523
sel-13	1	0	2.00225
ndx-2	1	0.693147	1.76671
C06H5.8	1	0	1.66692
fbxa-192	1	0	1.97853
M01B2.10	1	0.693147	1.85101
mrps-11	1	0	2.02792
sorf-2	1	0	2.05653
cal-7	1	0.693147	1.83497
nhr-2	1	0	1.7165
ZK563.7	1	0	1.51146
R11G1.7	1	0.693147	1.85942
K02G10.5	1	0	1.63936
C06H2.2	1	0	2.08128
elpc-3	1	0	2.09847
F53F4.11	1	0	2.01575
F53F4.16	1	0	1.58204
Y48G8AL.15	1	0.693147	1.91275
hpo-31	1	0	1.99621
erg-28	1	0.693147	1.82824
mma-1	1	0	2.13482
T10E9.1	1	0	1.80681
R04F11.5	1	0	1.80465
R04F11.3	1	0	1.65331
F52E1.3	1	0	1.51951
R186.3	1	0	2.05456
eif-3.K	1	0	2.14069
B0001.5	1	0	1.71598
B0001.8	1	0	1.96451
dhhc-6	1	0	2.04581
mon-2	1	0	2.09098
cpsf-4	1	0	1.76553
rpc-25	1	0.655392	1.97783
F27D9.2	1	0	1.83438
hum-6	1	0	1.5717
EEED8.2	1	0	1.8395
F46B6.4	1	0	2.01884
C27A12.4	1	0	1.59328
ZK792.5	1	0	2.06716
egl-45	1	0	2.12995
T20B12.7	1	0	2.06652
prx-14	1	0	1.72622
ZK686.1	1	0	2.00218
C41D11.9	1	0	1.51543
flap-1	1	0	2.06301
Y104H12D.4	1	0	2.00614
Y104H12D.2	1	0.693147	1.90986
kin-5	1	0	1.65
F56A8.5	1	0	2.00293
ZK1010.2	1	0	2.09652
mrg-1	1	0	1.94082
Y43F4B.9	1	0	2.07662
Y75B8A.19	1	0	2.09971
Y79H2A.3	1	0	2.02725
F28B3.6	1	0	1.96898
Y56A3A.16	1	0	1.67864
nhr-125	1	0	1.78827
R119.2	1	0	1.88041
eri-1	1	0	1.99306
C02F5.13	1	0	1.81906
K12H4.3	1	0	2.05991
T07A9.14	1	0	1.86331
mdt-30	1	0	2.00818
mau-8	1	0	2.04196
daf-25	1	0	1.95894
W03F8.3	1	0.693147	2.10103
clec-90	1	0.693147	2.06649
lin-37	1	0	1.94022
rnp-7	1	0	2.11162
gfrp-1	1	0	1.79083
ykt-6	1	0	1.93266
pho-5	1	0	2.07548
B0545.4	1	0	1.76338
adr-2	1	0	1.92358
R151.10	1	0	1.86186
R151.6	1	0	1.67714
exos-9	1	0	2.0114
D1007.10	1	0	2.02127
F37A4.1	1	0	2.12435
ZK973.9	1	0	1.95612
qdpr-1	1	0.664831	1.90267
F12F6.7	1	0	1.70053
F44B9.5	1	0	1.93309
F28B4.4	1	0	1.54854
tag-261	1	0	1.77141
aap-1	1	0	2.04248
F46B6.5	1	0	1.97612
oxi-1	1	0	2.14403
nhr-126	1	0	1.84318
cey-4	1	0	2.02074
rabx-5	1	0	1.60175
C24B9.3	1	0	1.74472
exos-1	1	0	1.90136
Y48A6B.3	1	0	1.97091
F25G6.8	1	0	1.92757
F45F2.9	1	0	2.12864
mrpl-4	1	0.693147	2.11445
mrps-2	1	0	2.05928
symk-1	1	0	1.95577
C10B5.1	1	0	1.63859
lmtr-2	1	0	1.90746
C34E7.3	1	0	1.55919
rpb-9	1	0	1.94613
rei-2	1	0.693147	1.92722
aos-1	1	0	2.08163
cul-5	1	0	2.07632
mics-1	1	0	2.01249
B0024.11	1	0	1.99295
psa-3	1	0.693147	1.59662
hpl-2	1	0	1.99906
K09D9.1	1	0	1.50034
skr-18	1	0	1.86361
Y66D12A.10	1	0	2.04366
D1014.4	1	0.693147	2.00351
Y55F3BL.4	1	0	1.82168
Y55F3BR.1	1	0	1.95237
csn-3	1	0	1.92566
T12D8.10	1	0	1.88813
tut-1	1	0	2.07361
Y41C4A.9	1	0	2.09184
M03C11.3	1	0	2.12273
M03C11.6	1	0	1.7787
fis-2	1	0	1.98707
pad-2	1	0	2.08404
clec-205	1	0	1.51952
nhr-110	1	0	1.52096
T16H12.3	1	0	2.00785
hal-2	1	0	1.57508
nhr-90	1	0.67427	1.53289
T28D6.6	1	0	2.12865
pen-2	1	0	1.9081
Y73C8B.1	1	0	1.74104
rabs-5	1	0.693147	1.99623
Y66D12A.8	1	0	2.08421
R144.12	1	0	2.10557
K11D2.5	1	0	1.96683
cpsf-3	1	0	1.96315
hda-2	1	0.693147	1.92367
fkh-6	1	0	1.58275
car-1	1	0	1.9784
vps-11	1	0	2.16649
spr-5	1	0	2.08911
eif-3.J	1	0	2.13948
Y40B1B.7	1	0	2.07011
Y20F4.8	1	0	1.6556
oxa-1	1	0	2.06778
ola-1	1	0	2.18517
snr-2	1	0	1.94057
F59C12.4	1	0	1.66106
rde-2	1	0	1.98302
suox-1	1	0	1.86077
adsl-1	1	0.655392	2.07106
gly-4	1	0	1.88423
aho-3	1	0.655392	1.74114
Y116F11B.9	1	0	1.56192
dpy-21	1	0	2.10619
cTel55X.1	1	0.693147	1.71075
wars-1	1	0	2.1215
tct-1	1	0.67427	2.10931
nsun-5	1	0	2.06747
mys-2	1	0	2.01334
phf-31	1	0.693147	1.57217
brf-1	1	0	1.98462
F23C8.3	1	0	1.68409
cdh-4	1	0	1.5039
flad-1	1	0.693147	1.97793
cogc-4	1	0	2.0827
emc-2	1	0	2.04704
fbxa-10	1	0.693147	1.80746
Y105E8A.2	1	0.693147	2.14345
fbxc-52	1	0	1.77159
T27F6.6	1	0	1.87017
Y51F10.2	1	0	1.70743
tag-342	1	0	1.91129
C25H3.7	1	0.693147	2.08704
eif-3.L	1	0.693147	2.05397
eif-2Bbeta	1	0	1.94567
Y47H9C.8	1	0	1.92605
gadr-5	1	0	1.66979
fbxa-216	1	0	1.98984
arx-1	1	0	2.09547
Y6B3B.9	1	0	2.11341
attf-6	1	0	1.88902
C50D2.2	1	0	1.56993
C48B6.3	1	0	2.026
C34B7.2	1	0	2.01979
daf-8	1	0.693147	1.64328
Y48G8AL.7	1	0	1.91267
dhfr-1	1	0	1.85787
F08G12.1	1	0	2.00688
edc-3	1	0	1.97577
prp-4	1	0	1.80746
tlf-1	1	0	2.13393
T23G11.4	1	0	1.94064
smg-2	1	0	2.10785
Y48G1C.12	1	0	1.88022
fdps-1	1	0	2.08771
fut-6	1	0	1.51782
sedl-1	1	0	1.59437
D2030.4	1	0.693147	2.07656
AH9.3	1	0.693147	1.61492
D2030.8	1	0	1.82659
rpl-17	1	0.693147	2.10667
cdc-48.3	1	0	2.04476
pgs-1	1	0	1.76902
K02A11.2	1	0.693147	1.57305
ath-1	1	0	1.99262
vacl-14	1	0	2.03834
gbas-1	1	0.693147	1.52468
F29D10.1	1	0	1.56294
Y105E8B.6	1	0	1.51282
mei-1	1	0.693147	1.83583
Y48G8AL.10	1	0	2.02724
Y73B3A.18	1	0	2.13125
exos-7	1	0	2.1139
T08D2.6	1	0	1.61796
K12C11.1	1	0	2.03264
sacy-1	1	0	1.95184
irk-2	1	0	1.50586
C37E2.2	1	0.693147	1.59433
grl-23	1	0	1.53862
set-29	1	0.693147	2.07171
skr-20	1	0	1.91967
nepr-1	1	0	2.0649
Y106G6D.8	1	0	1.69495
rsd-6	1	0	2.04452
ubc-14	1	0	2.10914
dpt-1	1	0	2.10983
Y40B1A.1	1	0	2.05757
mrpl-38	1	0	2.08713
K09E2.1	1	0	1.64202
F52B5.3	1	0	1.58772
R05D11.5	1	0	2.04305
R05D11.9	1	0	1.98749
eri-3	1	0	1.86032
ugt-58	1	0.681821	1.5271
taf-6.1	1	0	1.78292
T06A10.2	1	0	1.73
R07B7.10	1	0.693147	1.71595
arf-6	1	0	2.09702
snr-1	1	0	1.98704
sfa-1	1	0	2.10619
mbd-2	1	0	1.82818
C30H6.9	1	0	1.89916
let-391	1	0	1.82096
cyn-13	1	0	2.06511
Y116A8C.33	1	0	1.77082
C27A7.1	1	0	1.53244
emc-3	1	0	2.08198
Y62E10A.6	1	0	1.94921
F48E3.4	1	0.664831	1.81556
Y73F8A.32	1	0	1.97991
ZK355.2	1	0	1.85569
iars-2	1	0	1.96595
mnat-1	1	0	2.108
dsbn-1	1	0	1.99679
aph-2	1	0	2.03655
rpn-10	1	0	2.07473
atg-5	1	0	2.16344
map-2	1	0	2.13246
slc-25A10	1	0	1.97309
mec-15	1	0	1.90494
afmd-2	1	0	1.56756
W02H5.2	1	0.693147	1.9465
ubc-23	1	0	1.702
ergo-1	1	0	2.15433
Y50D4A.1	1	0	2.02971
elt-2	1	0	1.66582
fbxa-69	1	0	1.5268
lin-65	1	0	2.05439
hpo-18	1	0	2.11955
figl-1	1	0	1.93866
glrx-3	1	0	2.03319
T09F5.12	1	0	1.71617
K07A12.1	1	0	1.96739
Y37A1B.4	1	0	1.59809
Y57G11C.43	1	0	1.70841
vti-1	1	0	1.8427
rps-27	1	0	2.13606
rla-2	1	0	2.13899
agt-1	1	0	1.92991
Y67H2A.7	1	0	1.97061
csn-6	1	0	2.06934
kdp-1	1	0	2.11779
EGAP2.1	1	0	2.03683
tag-296	1	0	1.77854
C14A4.12	1	0	1.63716
plc-3	1	0	1.62056
dxbp-1	1	0.693147	1.9611
rpoa-49	1	0	2.0518
K08A2.2	1	0	1.77597
nsun-4	1	0	1.91202
F23F1.10	1	0	1.85364
F37B12.3	1	0.664831	1.9731
copb-1	1	0.693147	2.10283
C24H12.4	1	0	2.03891
zwl-1	1	0	1.79901
B0432.9	1	0	1.65498
apg-1	1	0	2.10929
pbs-5	1	0	2.0314
pph-6	1	0.693147	2.08763
sydn-1	1	0	2.12724
Y105E8A.21	1	0	1.9863
F59E12.6	1	0.650672	2.08745
K05C4.9	1	0	1.50415
hinf-1	1	0	2.0645
hmp-2	1	0	2.05749
ckb-1	1	0	2.02594
ubxn-1	1	0	2.01751
srg-20	1	0	1.50535
T27F6.7	1	0.693147	2.03407
C16C2.4	1	0.693147	2.0207
mrpl-54	1	0	1.81524
ska-1	1	0	1.76172
Y106G6H.14	1	0	2.06992
Y106G6H.6	1	0	1.83845
C50D2.7	1	0	1.90423
cdc-26	1	0	1.98364
ugt-31	1	0	1.53932
F59C6.5	1	0	2.14562
C17C3.3	1	0	1.55662
mrpl-41	1	0	2.05765
ZK858.5	1	0	1.85094
K07A1.15	1	0	1.51057
rla-1	1	0.664831	2.10358
thoc-3	1	0	1.89795
mdt-31	1	0	1.83592
prmt-7	1	0	1.98254
nfya-2	1	0	1.58679
C05G5.3	1	0	1.56629
fbxa-3	1	0	1.64928
T05F1.4	1	0	1.91252
Y92H12BR.7	1	0.67427	2.00899
Y39B6A.9	1	0	1.50662
parp-1	1	0	1.83066
ZK632.14	1	0.693147	1.95
Y54G11A.14	1	0	1.86742
fsn-1	1	0.693147	1.81704
rpl-43	1	0.693147	2.12277
tac-1	1	0	2.01809
mrpl-37	1	0	2.15586
F45H10.2	1	0	2.13868
F53F10.8	1	0.693147	1.99586
F17C8.9	1	0	1.54625
T16G12.6	1	0	2.06568
nol-9	1	0	2.09046
B0564.2	1	0.693147	1.7516
C01G5.9	1	0.693147	1.58972
C05D2.10	1	0	1.90333
bicd-1	1	0	2.08311
Y73B6BL.27	1	0	1.62773
T16G1.9	1	0	2.06361
F54E7.9	1	0	1.80311
swp-1	1	0	2.04241
B0336.13	1	0	1.84121
oxy-4	1	0	1.83343
T10F2.5	1	0	1.60468
soc-1	1	0.693147	1.65273
F35H10.6	1	0	1.83084
D2045.7	1	0	1.75221
dars-2	1	0	1.93769
pfs-2	1	0	2.08423
ttr-7	1	0	1.61758
tbcc-1	1	0	2.12055
cku-70	1	0	1.86779
metl-2	1	0	2.03726
tag-280	1	0	1.79636
snrp-200	1	0	2.10849
ZK512.4	1	0.693147	2.0549
F15D4.5	1	0	1.53989
rpl-4	1	0.649543	2.12869
Y57A10A.31	1	0	1.69443
efl-2	1	0	2.0716
Y47G6A.9	1	0	2.09637
F44E5.1	1	0	2.14279
cyp-25A3	1	0	1.63395
C32E8.9	1	0.693147	1.9587
nac-2	1	0	1.53651
C36A4.10	1	0	1.76692
eif-3.D	1	0	2.09433
cyn-16	1	0	2.04159
R06A4.2	1	0	1.91826
mrpl-22	1	0	1.96033
D1007.4	1	0.693147	1.75823
Y32H12A.6	1	0	1.79503
gpx-2	1	0	2.10539
rcq-5	1	0.693147	1.9484
Y94H6A.12	1	0	1.80376
Y94H6A.10	1	0	1.6205
sas-4	1	0	1.84505
glod-4	1	0	1.91091
srp-2	1	0	1.62369
ced-4	1	0	1.97696
coq-8	1	0	2.06524
nhr-128	1	0	1.80021
C35D10.7	1	0	1.80581
C35D10.8	1	0	1.60678
vps-22	1	0	1.9915
F19C7.4	1	0	1.7132
apc-11	1	0	1.93075
F35G12.5	1	0	1.77998
F35G12.12	1	0	2.06919
Y46H3A.5	1	0	1.60623
him-18	1	0	1.66075
rpl-37	1	0	2.10347
dnj-18	1	0	1.66889
T04A8.7	1	0	2.03452
T04A8.8	1	0	1.70239
T20F5.6	1	0	2.04827
mksr-2	1	0.636514	1.69715
unc-50	1	0.693147	2.12509
pdcd-2	1	0	2.05755
clk-1	1	0	2.02278
Y70G10A.2	1	0	1.6312
T04D1.2	1	0	1.85041
pmk-1	1	0	1.90885
nrd-1	1	0	1.98673
cdc-6	1	0	1.69554
pqn-92	1	0	1.68333
F10A3.17	1	0.67427	1.81041
C05D11.1	1	0	2.08847
vps-16	1	0	2.13105
C43E11.9	1	0	1.91271
let-355	1	0	2.00336
Y47D3A.32	1	0	1.87704
F33D4.4	1	0	2.03723
C45G9.5	1	0	1.97006
prdx-3	1	0	2.08577
rnp-4	1	0	2.1101
clec-85	1	0	1.7718
nth-1	1	0	1.96438
Y71H2B.11	1	0	1.6314
dnj-4	1	0	1.88331
H06I04.3	1	0	2.10079
Y71H2B.5	1	0	2.0549
mdt-19	1	0	2.01063
tsp-9	1	0	1.64792
maa-1	1	0.664831	1.59442
dlc-3	1	0	1.56671
Y10G11A.1	1	0	1.71209
Y71G12B.23	1	0.693147	1.52714
atf-2	1	0.67427	1.63981
mig-14	1	0.67427	1.75088
B0511.11	1	0	1.95204
nab-1	1	0	1.78526
Y48C3A.3	1	0	1.99538
gap-1	1	0	1.85056
R144.3	1	0	2.0186
Y37E3.30	1	0.693147	1.53236
C33C12.10	1	0	1.90421
ZK546.5	1	0.693147	1.76775
cdr-7	1	0.693147	1.69217
bpnt-1	1	0.693147	2.12437
rsr-1	1	0	2.09071
trx-1	1	0	1.61802
exc-4	1	0.693147	1.85239
mxt-1	1	0.693147	1.73991
dhhc-8	1	0	1.95413
T28D6.4	1	0	1.75309
inso-1	1	0	1.65222
mlh-1	1	0.693147	2.06399
nhr-274	1	0	2.01623
F58E2.3	1	0	1.62003
Y41D4A.3	1	0	1.72037
gst-3	1	0	1.66843
R08D7.7	1	0	1.7666
Y48G9A.9	1	0	1.87409
mage-1	1	0	1.96107
ZK829.9	1	0	1.7784
K09E2.3	1	0.664831	1.68581
nmy-1	1	0	1.96663
cwn-2	1	0	1.55282
str-118	1	0	1.78663
dml-1	1	0	1.52779
daf-31	1	0	2.05101
pgp-4	1	0.693147	1.78439
best-19	1	0.693147	1.7621
C14B4.2	1	0	1.75353
tcc-1	1	0.693147	2.08364
egal-1	1	0	2.12478
nep-21	1	0	1.7348
R05C11.4	1	0	1.79955
F45G2.10	1	0.693147	1.77306
mpk-1	1	0	1.68932
Y17G7B.17	1	0	2.13386
nhr-20	1	0	1.99714
herc-1	1	0	2.1388
Y48G1BM.6	1	0	1.81273
F48E8.2	1	0	2.01176
sre-43	1	0	1.63226
cox-17	1	0	1.76925
Y54G11A.9	1	0	2.01146
helq-1	1	0	2.00639
F25H8.1	1	0.693147	1.80319
F25H8.2	1	0.693147	1.86286
ttc-7	1	0	2.06742
M01F1.9	1	0	1.99023
nhr-141	1	0	1.82852
C18E3.3	1	0	1.78526
rpl-16	1	0	2.13853
M01F1.8	1	0	1.9535
Y55F3BR.11	1	0	1.61141
clpf-1	1	0	1.8689
coq-4	1	0	1.69665
dph-1	1	0	1.98488
trp-2	1	0	1.614
iffb-1	1	0	2.10331
F56A11.5	1	0	1.97463
Y66D12A.21	1	0.693147	1.98375
par-2	1	0	1.60734
elc-1	1	0	1.90839
2021-04-01	1	0	1.88322
Y40B10A.9	1	0.67427	1.66446
wdr-4	1	0.693147	2.00141
ttr-48	1	0.664831	1.93387
Y57A10A.8	1	0	1.81882
wve-1	1	0	2.00349
scrm-1	1	0	1.67114
set-27	1	0.693147	1.92496
mrp-6	1	0	1.76254
Y71H2AM.15	1	0	1.56541
sft-1	1	0.693147	2.16184
Y82E9BR.19	1	0	1.88683
Y92H12BL.5	1	0	2.15399
K07A1.10	1	0.693147	2.06176
snf-6	1	0.693147	1.88846
T24C4.5	1	0	1.52127
Y65B4BR.1	1	0	1.64776
rnp-5	1	0	2.02423
moma-1	1	0	2.11232
Y39A3CL.4	1	0	1.95896
Y39A3CL.3	1	0	1.92019
hus-1	1	0.693147	1.58909
T24H7.3	1	0	2.06662
B0348.2	1	0	1.55864
nhr-195	1	0	1.89486
Y48A5A.3	1	0	1.73808
Y48A5A.1	1	0	1.89632
ulp-3	1	0	1.99302
F52C12.6	1	0	1.84779
sars-2	1	0	2.15369
jmjd-5	1	0	2.00702
mrps-21	1	0.693147	2.02012
ubxn-6	1	0	2.01103
H06H21.11	1	0	1.90021
jac-1	1	0	1.87523
dpf-5	1	0	2.11555
tsen-34	1	0	1.72464
B0546.3	1	0	2.08236
K09B11.4	1	0	1.94136
dnj-15	1	0	2.07177
fbxc-47	1	0	1.5926
pis-1	1	0	1.97118
K07F5.14	1	0	1.91848
M01E11.1	1	0	1.88643
acl-9	1	0	2.11099
T20D3.6	1	0	1.99424
ppgn-1	1	0	2.075
cct-8	1	0	2.01985
rpn-7	1	0	2.03996
D1025.1	1	0	1.89561
bcs-1	1	0	1.92746
mrps-18B	1	0	2.03645
T13H5.8	1	0	1.97522
M05D6.2	1	0	1.97808
F22B5.10	1	0	1.98608
evl-20	1	0	1.6406
C11D2.7	1	0	2.00081
T12E12.3	1	0	1.67263
cec-6	1	0	1.823
C15C8.7	1	0	1.80783
D2024.5	1	0	1.91107
C17B7.5	1	0	1.50374
cdd-2	1	0	1.8022
F55A12.2	1	0	1.94384
chpf-2	1	0	1.59021
ufl-1	1	0	2.16604
nprl-2	1	0	1.86358
aqp-4	1	0	1.5206
Y54G2A.50	1	0	1.71108
set-23	1	0	1.60302
ced-2	1	0	1.99576
F49C12.11	1	0	2.09514
F35H12.5	1	0	1.92523
C56E6.7	1	0	1.79069
nprl-3	1	0	2.05139
ZC250.2	1	0	1.99513
cks-1	1	0	1.63956
C09G4.4	1	0	1.80618
C28C12.1	1	0	1.55676
ZK1236.9	1	0	1.65053
iglr-2	1	0	2.14585
B0303.14	1	0	1.90191
F44E2.8	1	0	1.90615
asna-1	1	0	2.16479
ZK637.4	1	0	1.54818
lnkn-1	1	0	2.1271
pqn-96	1	0	2.02664
cutc-1	1	0	2.01443
R05D3.12	1	0	1.95806
R05D3.3	1	0	1.57539
atln-1	1	0	2.13839
rha-2	1	0	2.0765
C06E1.11	1	0	1.58467
set-3	1	0	1.81333
ZK1098.11	1	0	1.59765
vps-53	1	0	2.02251
ZK228.3	1	0	1.62743
D2096.12	1	0	1.86427
rpt-5	1	0	2.11299
D2096.11	1	0	2.0267
wdr-12	1	0	2.0209
T01G1.4	1	0	1.88727
nhr-100	1	0	1.51418
C15C7.7	1	0	1.85212
R10H10.6	1	0	1.88455
ZK809.3	1	0	2.12652
dnj-2	1	0	1.90687
mttu-1	1	0	1.78348
skih-2	1	0	2.0042
trpp-12	1	0	2.09461
Y5F2A.4	1	0	1.94063
elpc-4	1	0	2.0176
F47H4.2	1	0	1.54142
glrx-22	1	0	1.90413
swd-2.1	1	0	1.93717
mrpl-1	1	0	2.13186
parg-1	1	0	1.93834
Y80D3A.9	1	0	1.70502
F21D5.6	1	0	1.96676
rap-1	1	0	1.88436
Y40C5A.4	1	0	1.82562
pha-1	1	0	2.02737
Y71G10AR.4	1	0.693147	1.7521
T22C8.1	1	0	2.02916
T14B4.1	1	0	2.03517
pro-2	1	0	2.11566
K02F3.12	1	0.67427	2.03119
Y34F4.5	1	0	1.67634
F59E12.15	1	0	2.0378
W06A11.4	1	0	1.54735
adbp-1	1	0.664831	1.87873
H20J04.4	1	0	1.9965
mog-2	1	0	1.99773
C17G10.1	1	0	1.92549
pinn-1	1	0	1.91287
cct-3	1	0	2.04235
M106.7	1	0	1.9025
rom-5	1	0	2.02865
Y23H5B.6	1	0	2.02518
rsp-4	1	0	2.08488
algn-2	1	0	2.04318
pink-1	1	0	2.11901
F56D1.1	1	0	1.75643
ilcr-2	1	0	1.9154
W03D8.3	1	0	1.75916
crn-1	1	0.693147	1.76049
xpd-1	1	0	2.10252
Y50D7A.1	1	0	1.98897
rpb-7	1	0	1.90096
F41G3.6	1	0	1.95186
C25H3.3	1	0	1.94005
F59E12.1	1	0	1.82699
rars-2	1	0.664831	1.93665
ddl-1	1	0	1.77033
F59E12.9	1	0	1.97479
T28F2.2	1	0.693147	1.5836
ttll-12	1	0	2.05254
Y54G11A.17	1	0.664831	2.00613
ZK1248.15	1	0	1.69618
xrn-2	1	0.693147	2.08997
Y71F9B.2	1	0	2.08611
zipt-3	1	0	2.04139
ZK1127.4	1	0	2.0437
ZK1127.13	1	0	1.5671
ZK1127.12	1	0	1.91196
Y22D7AL.9	1	0	1.50394
nars-2	1	0	2.08445
M01G5.3	1	0	2.1331
cyy-1	1	0.693147	2.05612
F10E7.6	1	0	1.97688
W06E11.1	1	0	2.00559
rnh-1.0	1	0.693147	1.99401
ndx-3	1	0	1.81457
mrps-14	1	0.693147	2.12659
R05H5.4	1	0	1.54516
nduf-5	1	0	2.13427
Y71H2AM.1	1	0	2.12781
sds-22	1	0	1.93562
C08B11.9	1	0	2.00668
polg-1	1	0	2.03842
B0495.5	1	0	2.05607
[truncated: 40 more rows]
